# Supplementary material for: Highly mesoporous silicon derived from waste iron slag for high performance lithium ion battery anodes
Source: Royal Society of Chemistry journal article supplement (doi:10.1039/c5ta04693a), 2015-01-01
Supplement: c5ta04693a1.pdf [file c5ta04693a1.pdf]

## **Electronic supplementary information**

### **Highly Mesoporous Silicon Derived from Waste Iron Slag for High Performance Lithium Ion Battery Anodes**

Jinyoung Chun,<sup>‡</sup> Sunhyung An,<sup>‡</sup> and Jinwoo Lee\*

Department of Chemical Engineering, Pohang University of Science and Technology  
(POSTECH), Pohang, 790-784, Republic of Korea

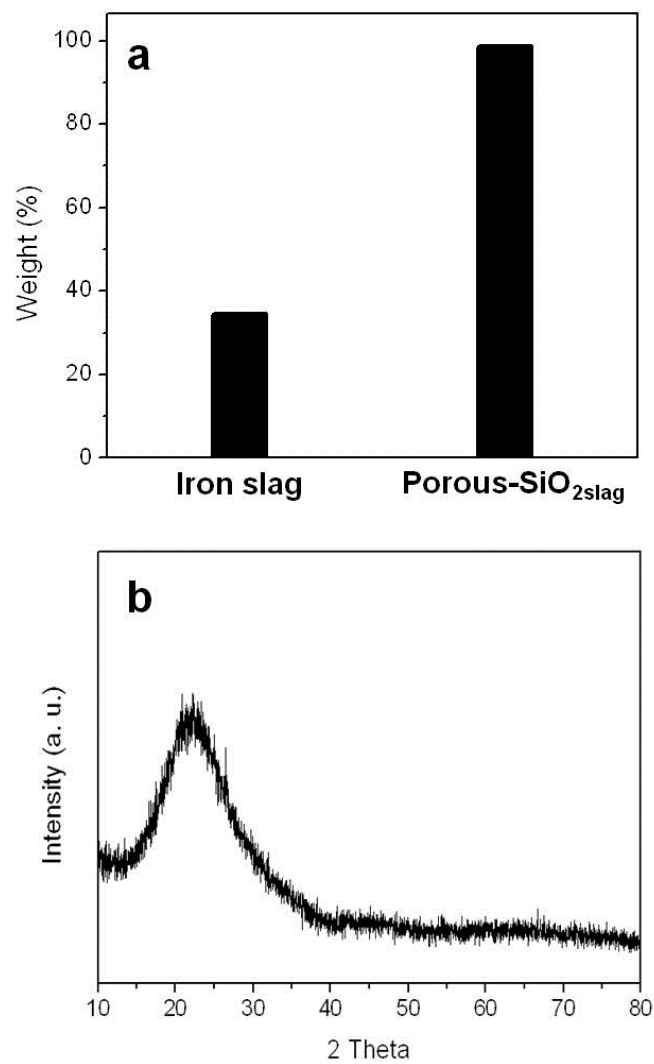

**Fig. S1.** ICP-AES result and XRD pattern of Porous-SiO<sub>2</sub>slag (intermediate product). (a) Weight ratio of SiO<sub>2</sub> in the iron slag (34.6 wt%) and Porous-SiO<sub>2</sub>slag (98.7 wt%). (b) XRD pattern of Porous-SiO<sub>2</sub>slag.

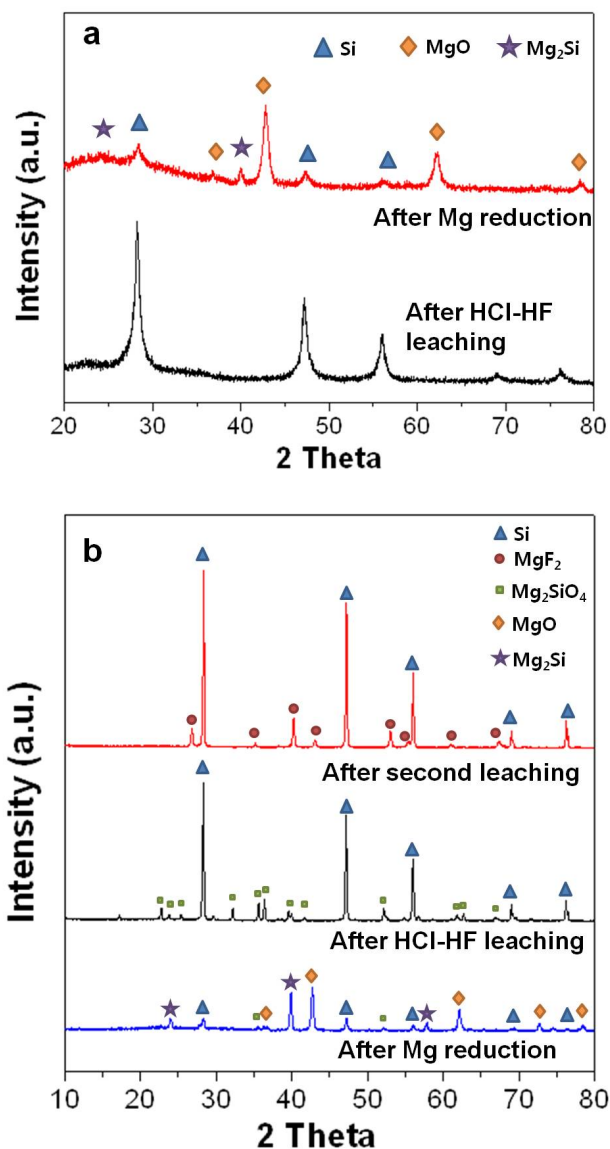

**Fig. S2.** (a) XRD patterns of the product after magnesiothermic reduction with NaCl following removal of NaCl, and the resulting Porous-Si<sub>slag</sub> after HCl-HF leaching. (b) XRD patterns of the product after magnesiothermic reduction without NaCl, the intermediate product after HCl-HF leaching, and the resulting Bulk-Si<sub>slag</sub> after second leaching with HF-CH<sub>3</sub>COOH.

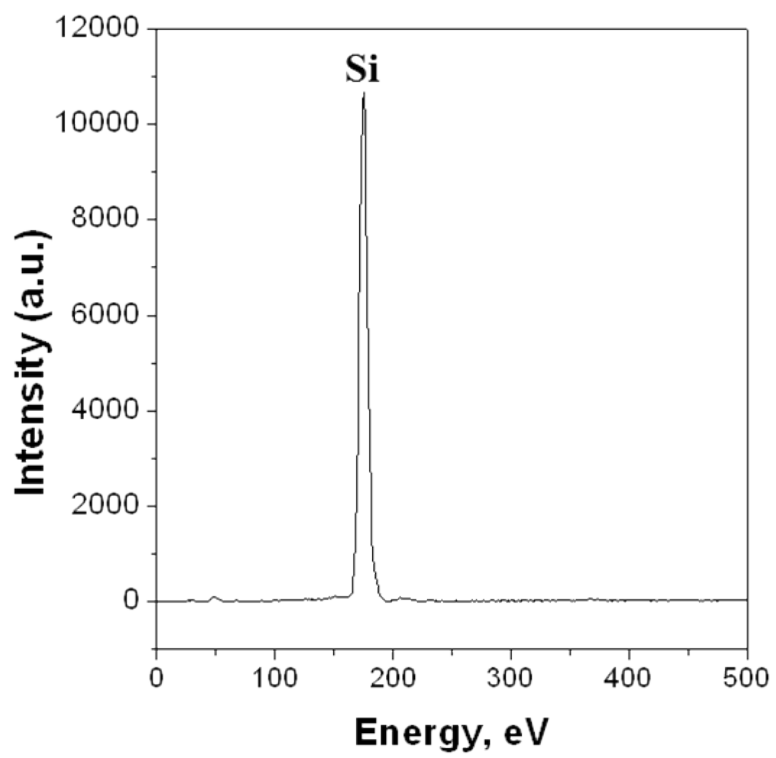

**Fig. S3.** Energy-dispersive X-ray spectrum of Porous-Si<sub>slag</sub>.

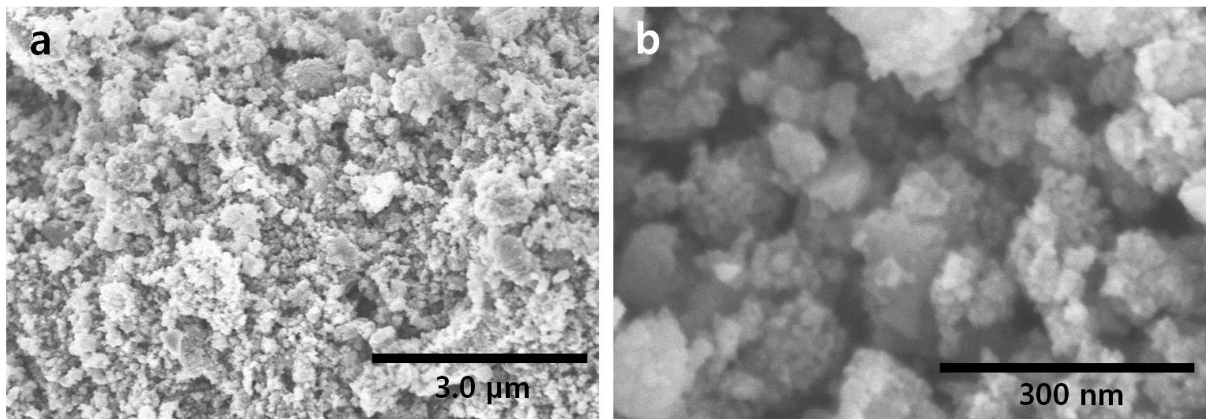

**Fig. S4.** (a,b) SEM images of C-Porous-Si<sub>slag</sub>.

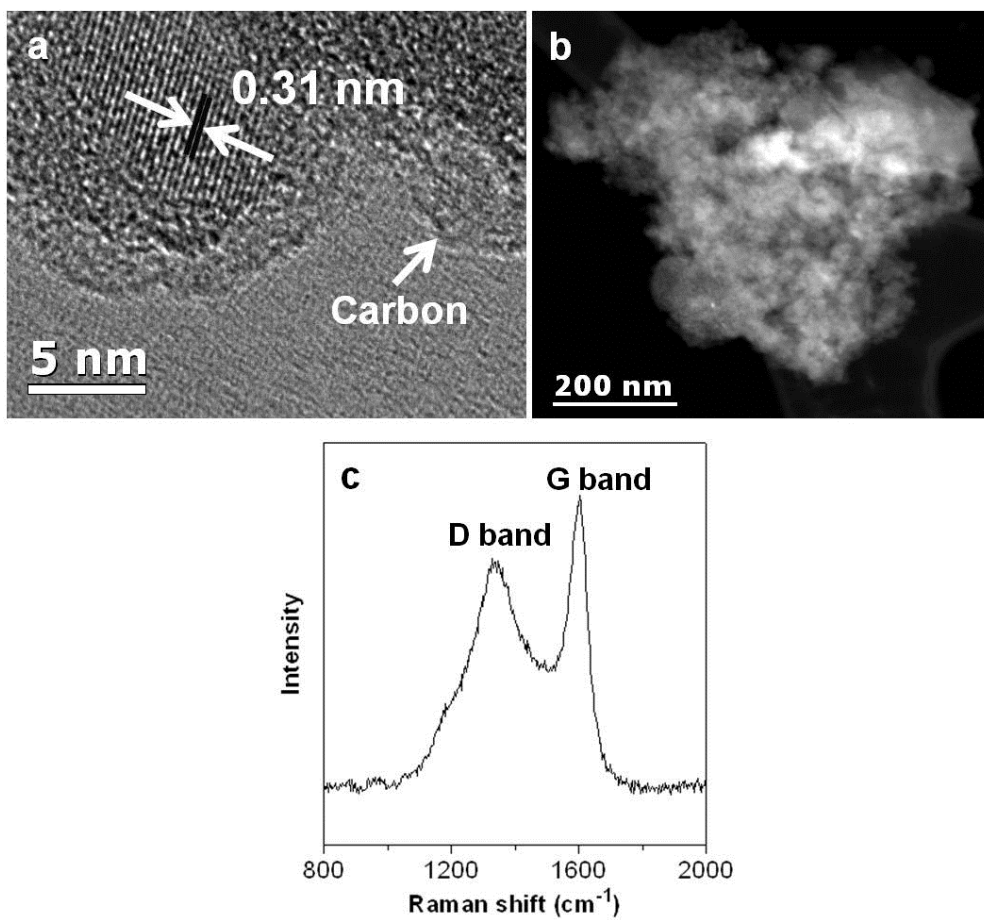

**Fig. S5.** (a) HR-TEM image, (b) STEM image and (c) Raman spectrum of C-Porous-Si<sub>slag</sub>.

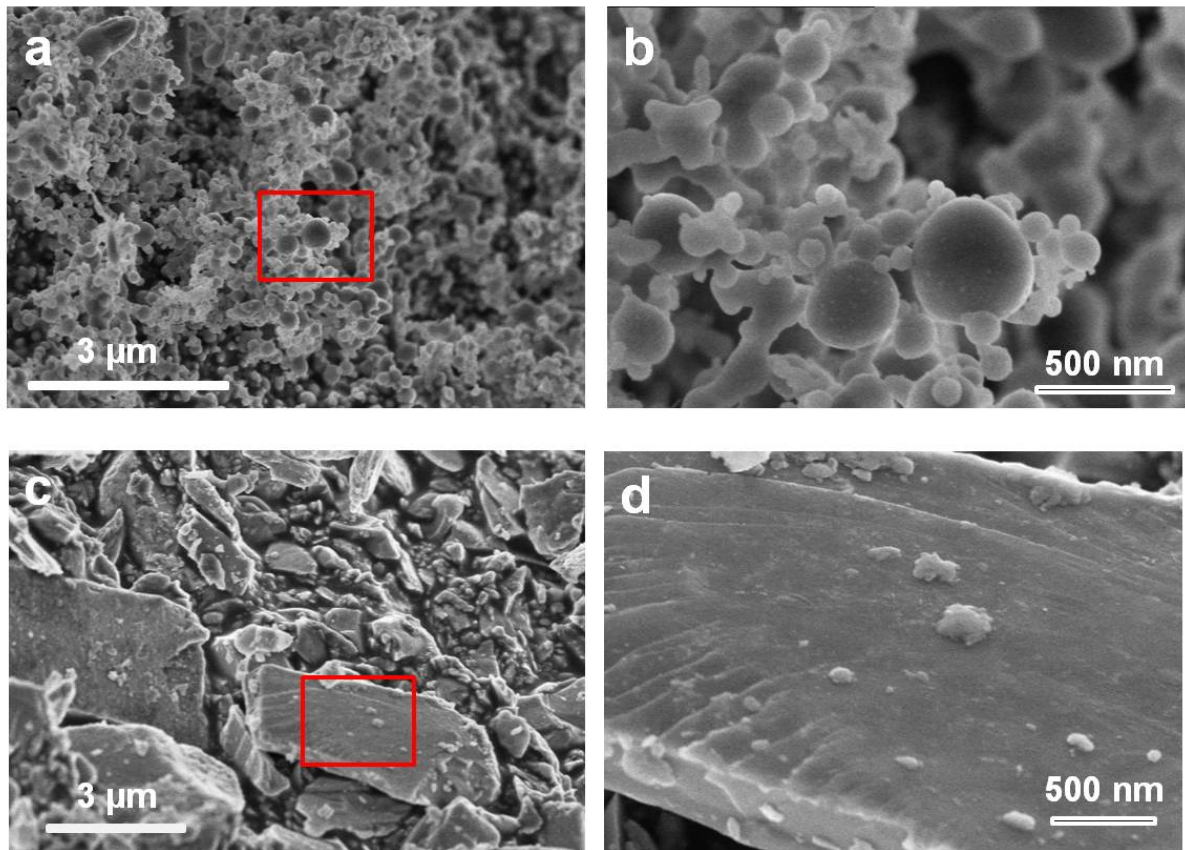

**Fig. S6.** (a) SEM image of Si-nano and (b) its magnified image from the red box in (a). (c) SEM image of Si-micro and (d) its magnified image from the red box in (c).

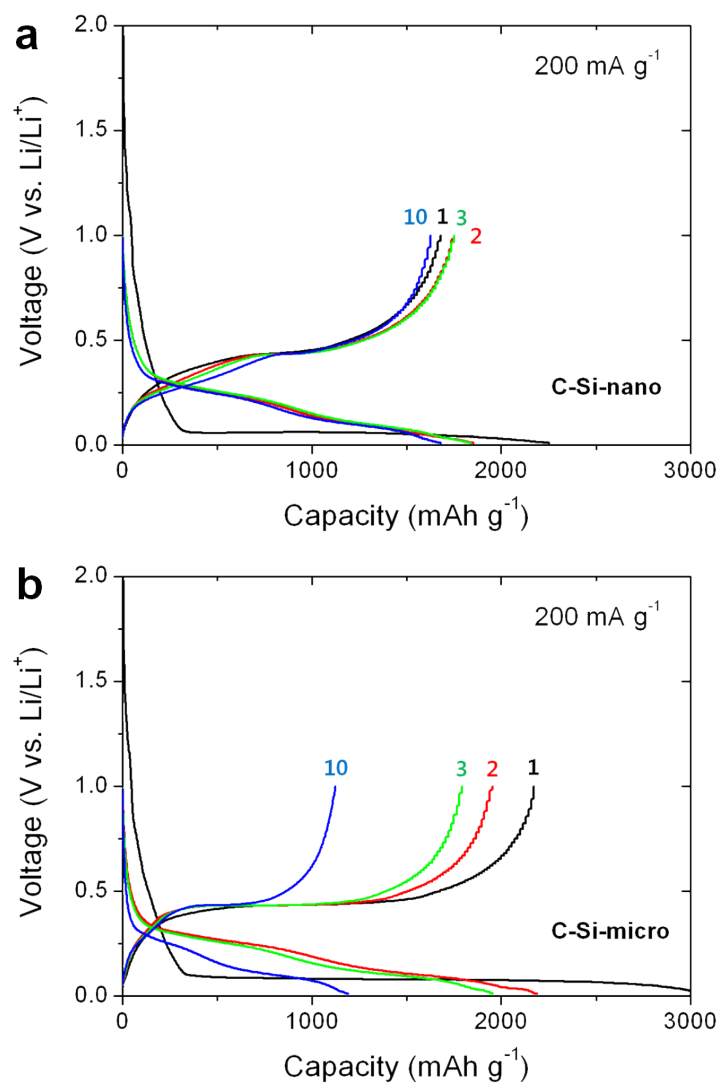

**Fig. S7.** The voltage profiles of (a) C-Si-nano and (b) C-Si-micro at 200 mA g<sup>-1</sup> from 1 to 10 cycles.



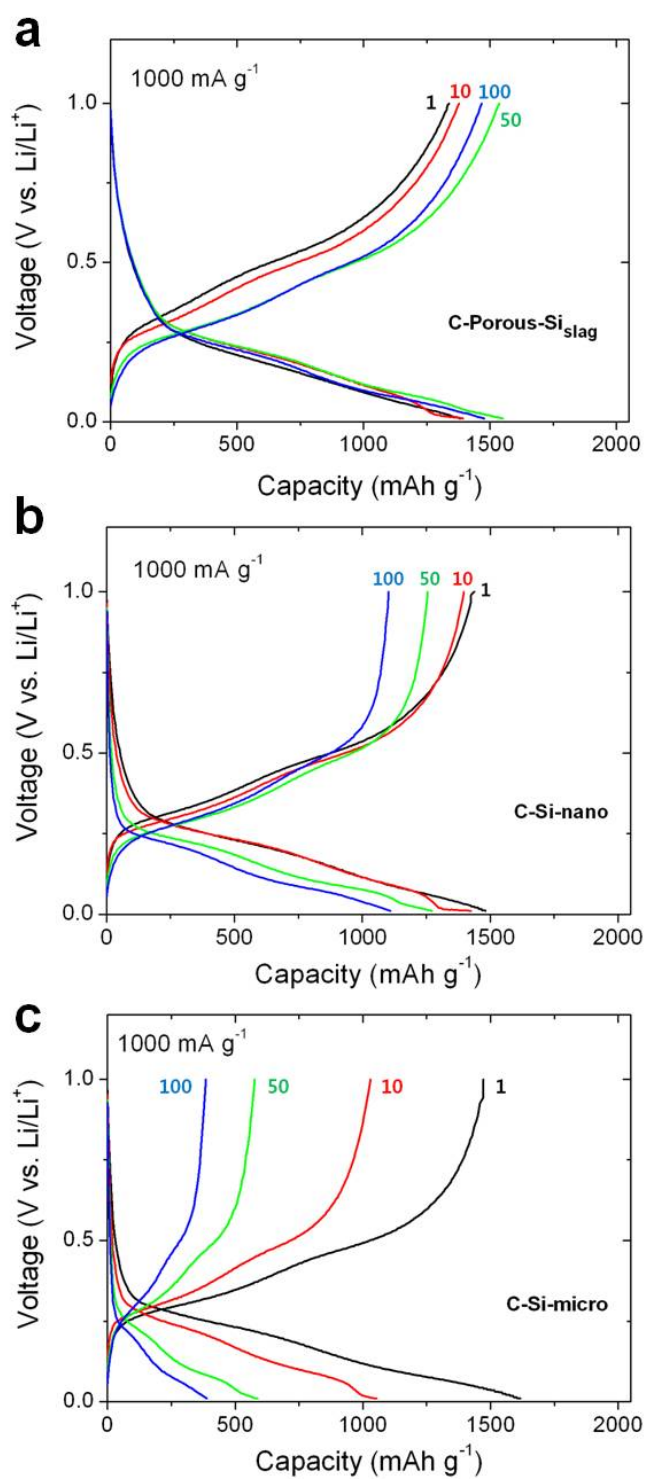

**Fig. S8.** Voltage profiles of (a) C-Porous-Si<sub>slag</sub>, (b) C-Si-nano and (c) C-Si-micro at  $1000 \text{ mA g}^{-1}$  from 1 to 100 cycles.

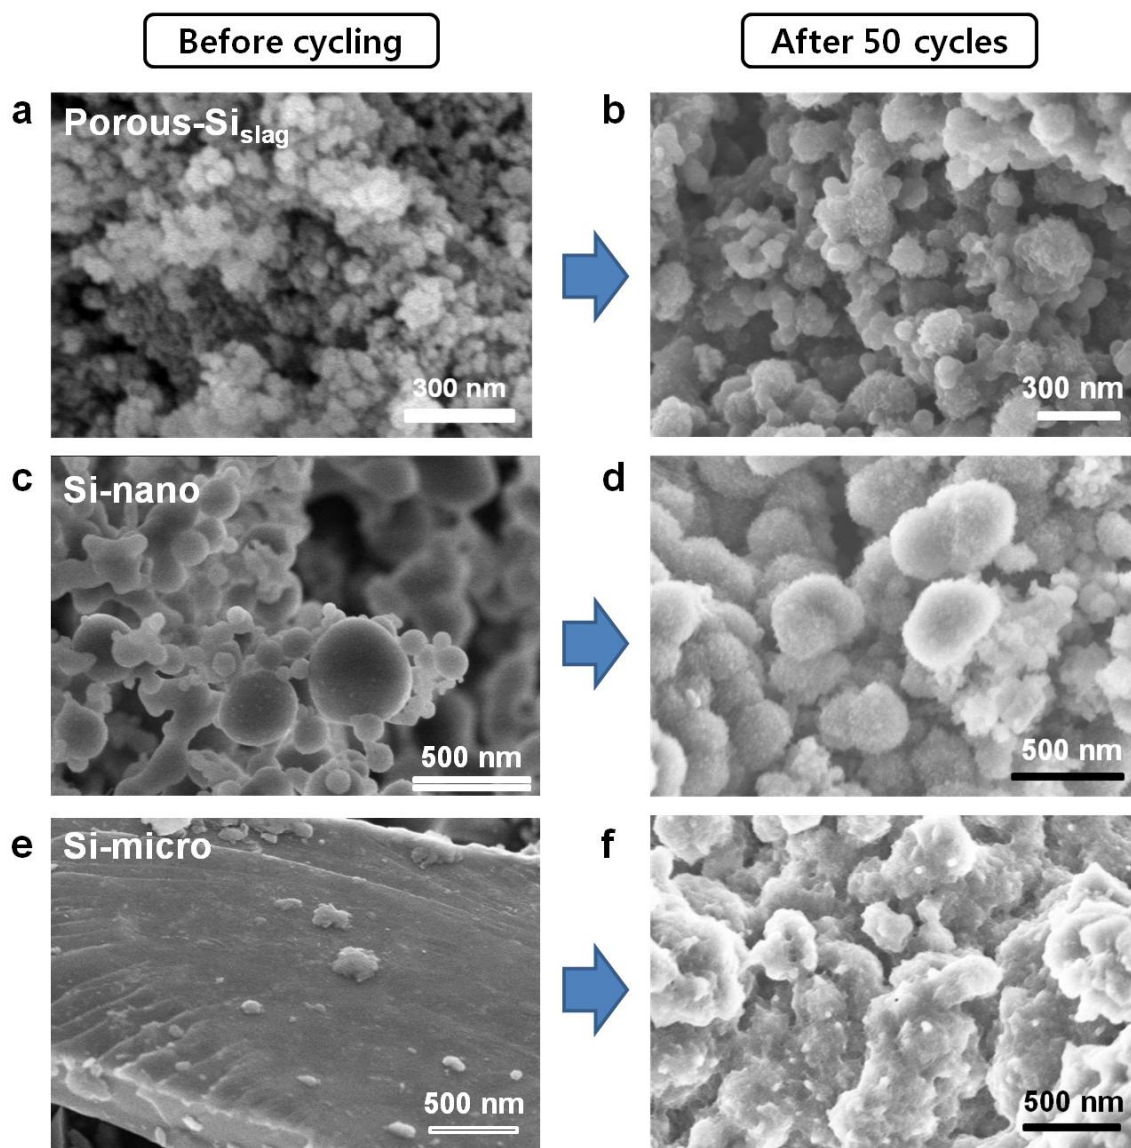

**Fig. S9.** SEM images of Porous-Si<sub>slag</sub> (a) before and (b) after 50 cycles. SEM images of Si-nano (c) before and (d) after 50 cycles. SEM images of Si-micro (e) before and (f) after 50 cycles.

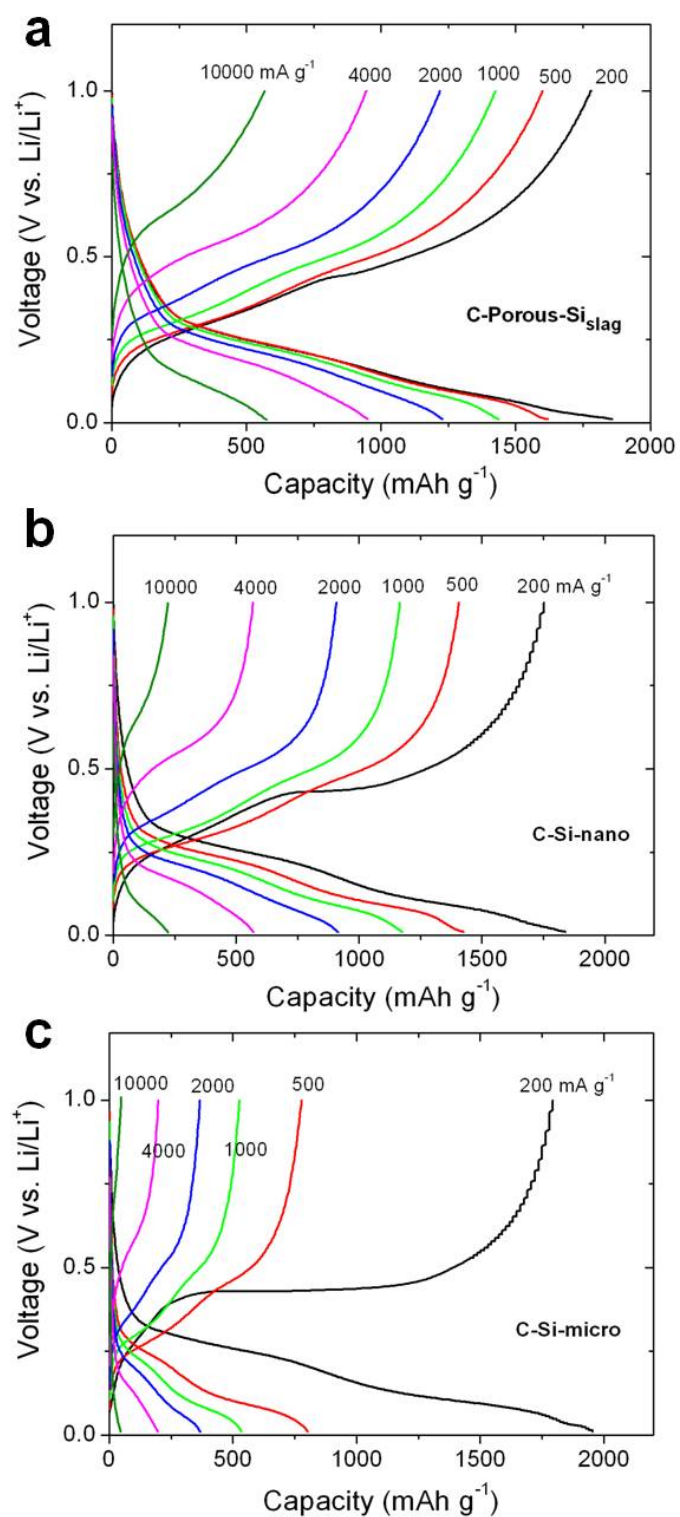

**Fig. S10.** Voltage profiles of (a) C-Porous-Si<sub>slag</sub>, (b) C-Si-nano and (c) C-Si-micro at different current densities.

**Table S1.** Structural parameters of iron slag, Porous-SiO<sub>2</sub>slag, Porous-Si<sub>slag</sub>, Bulk-Si<sub>slag</sub> and commercial Si materials.

|                              | BET surface area<br>(m <sup>2</sup> g <sup>-1</sup> ) | Single point total pore volume<br>(cm <sup>3</sup> g <sup>-1</sup> ) |
|------------------------------|-------------------------------------------------------|----------------------------------------------------------------------|
| Iron slag                    | 0.9                                                   | 0                                                                    |
| Porous-SiO <sub>2</sub> slag | 570                                                   | 0.58                                                                 |
| Porous-Si <sub>slag</sub>    | 438                                                   | 0.91                                                                 |
| Bulk-Si <sub>slag</sub>      | 5.6                                                   | 0.03                                                                 |
| Si-nano                      | 12                                                    | 0.02                                                                 |
| Si-micro                     | 3.8                                                   | 0.01                                                                 |
